# Investigating the physical properties of transiting hot Jupiters with the 1.5-m Kuiper Telescope

Jake D. Turner,<sup>1,2★</sup> Robin M. Leiter,<sup>1</sup> Lauren I. Biddle,<sup>2,3</sup> Kyle A. Pearson,<sup>4</sup> Kevin K. Hardegree-Ullman,<sup>5</sup> Robert M. Thompson,<sup>2</sup> Johanna K. Teske,<sup>2†</sup> Ian T. Cates,<sup>2</sup> Kendall L. Cook,<sup>2</sup> Michael P. Berube,<sup>2</sup> Megan N. Nieberding,<sup>2</sup> Christen K. Jones,<sup>2</sup> Brandon Raphael,<sup>2</sup> Spencer Wallace,<sup>2</sup> Zachary T. Watson<sup>2</sup> and Robert E. Johnson<sup>6</sup>

<sup>1</sup>Department of Astronomy, University of Virginia, Charlottesville, VA 22904, USA

<sup>2</sup>Steward Observatory, University of Arizona, Tucson, AZ 85721, USA

<sup>3</sup>Department of Physics and Astronomy, Northern Arizona University, Flagstaff, AZ 86011, USA

<sup>4</sup>Lunar and Planetary Laboratory, University of Arizona, Tucson, AZ 85721, USA

<sup>5</sup>Department of Physics and Astronomy, University of Toledo, Toledo, OH 43606, USA

<sup>6</sup>Department of Materials Science and Engineering, University of Virginia, Charlottesville, VA 22904, USA

Accepted 2017 August 25. Received 2017 August 24; in original form 2016 December 27

## ABSTRACT

We present new photometric data of 11 hot Jupiter transiting exoplanets (CoRoT-12b, HAT-P-5b, HAT-P-12b, HAT-P-33b, HAT-P-37b, WASP-2b, WASP-24b, WASP-60b, WASP-80b, WASP-103b and XO-3b) in order to update their planetary parameters and to constrain information about their atmospheres. These observations of CoRoT-12b, HAT-P-37b and WASP-60b are the first follow-up data since their discovery. Additionally, the first near-UV transits of WASP-80b and WASP-103b are presented. We compare the results of our analysis with previous work to search for transit timing variations (TTVs) and a wavelength dependence in the transit depth. TTVs may be evidence of a third body in the system, and variations in planetary radius with wavelength can help constrain the properties of the exoplanet's atmosphere. For WASP-103b and XO-3b, we find a possible variation in the transit depths which may be evidence of scattering in their atmospheres. The *B*-band transit depth of HAT-P-37b is found to be smaller than its near-IR transit depth and such a variation may indicate TiO/VO absorption. These variations are detected from 2–4.6 $\sigma$ , so follow-up observations are needed to confirm these results. Additionally, a flat spectrum across optical wavelengths is found for five of the planets (HAT-P-5b, HAT-P-12b, WASP-2b, WASP-24b and WASP-80b), suggestive that clouds may be present in their atmospheres. We calculate a refined orbital period and ephemeris for all the targets, which will help with future observations. No TTVs are seen in our analysis with the exception of WASP-80b and follow-up observations are needed to confirm this possible detection.

**Key words:** techniques: photometric – planets and satellites: atmospheres – planets and satellites: gaseous planets – planet–star interactions.

## 1 INTRODUCTION

To date, over 3400 exoplanets have been discovered (NASA Exoplanet Archive; Akeson et al. 2013) and most of these planets have been found using the transit method (e.g. Charbonneau

et al. 2000; Henry et al. 2000) in large-scale transit surveys such as *Kepler* (Borucki et al. 2010), *K2* (Howell et al. 2014), *WASP* (Pollacco et al. 2006; Collier Cameron et al. 2007) and *CoRoT* (Baglin 2003; Moutou et al. 2013). Transiting exoplanet systems (TEPs) are of great interest because their radius can be directly measured in relation to their star with photometric observations (Charbonneau et al. 2000; Henry et al. 2000). With the addition of spectroscopic and radial velocity measurements, many physical properties of TEP systems (mass, radius, semimajor axis, gravity,

\* E-mail: jt6an@virginia.edu

† Origins Fellow at Carnegie DTM/OCIW

**Table 1.** Journal of observations.

| Planet name | Date (UT)        | Filter <sup>1</sup> | Cadence (s) | $N_{\text{pts}}$ | OoT RMS <sup>2</sup> (mmag) | Res RMS <sup>3</sup> (mmag) | Seeing (arcsec) | $k^a$ | $\chi_r^2{}^b$ |
|-------------|------------------|---------------------|-------------|------------------|-----------------------------|-----------------------------|-----------------|-------|----------------|
| CoRoT-12b   | 2013 February 15 | <i>R</i>            | 60.39       | 265              | 6.06                        | 4.99                        | 1.96–4.06       | 4     | 1.32           |
| HAT-P-5b    | 2015 June 6      | <i>U</i>            | 80.64       | 191              | 3.02                        | 2.84                        | 1.36–2.17       | 4     | 0.97           |
| HAT-P-12b   | 2014 January 19  | <i>B</i>            | 188.25      | 89               | 1.13                        | 1.27                        | 2.22–2.96       | 7     | 1.99           |
| HAT-P-33b   | 2012 April 6     | <i>R</i>            | 24.29       | 706              | 3.65                        | 4.15                        | 1.01–2.68       | 4     | 7.84           |
| HAT-P-37b   | 2015 July 1      | <i>B</i>            | 115.51      | 128              | 2.37                        | 2.88                        | 0.98–2.45       | 4     | 1.10           |
| HAT-P-37b   | 2015 July 1      | <i>R</i>            | 115.51      | 129              | 2.33                        | 2.30                        | 0.98–2.45       | 4     | 1.33           |
| WASP-2b     | 2014 June 14     | <i>B</i>            | 59.31       | 230              | 2.41                        | 2.28                        | 1.43–2.68       | 7     | 3.55           |
| WASP-24b    | 2012 March 23    | <i>R</i>            | 24.95       | 531              | 2.41                        | 2.55                        | 1.03–2.12       | 7     | 4.06           |
| WASP-24b    | 2012 April 6     | <i>R</i>            | 26.77       | 434              | 5.14                        | 5.73                        | 1.01–2.72       | 6     | 2.04           |
| WASP-60b    | 2012 December 1  | <i>B</i>            | 20.46       | 751              | 5.30                        | 4.65                        | 0.83–6.82       | 4     | 1.21           |
| WASP-80b    | 2014 June 16     | <i>U</i>            | 93.50       | 160              | 7.76                        | 7.20                        | 1.54–2.92       | 7     | 1.15           |
| WASP-103b   | 2015 June 3      | <i>U</i>            | 65.05       | 363              | 3.66                        | 3.62                        | 1.37–2.56       | 6     | 1.29           |
| XO-3b       | 2012 November 30 | <i>B</i>            | 40.63       | 418              | 2.04                        | 2.20                        | 1.44–2.23       | 4     | 1.96           |

<sup>1</sup>Filter: *B* is the Harris *B* (330–550 nm), *R* is the Harris *R* (550–900 nm) and *U* is the Bessell *U* (303–417 nm). <sup>2</sup>OoT RMS relative flux.

<sup>3</sup>Residual (res) RMS flux after subtracting the EXOMOP best-fitting model from the data.

<sup>a</sup> $k$  is the degrees of freedom used in the EXOMOP best-fitting model.

<sup>b</sup>Reduced  $\chi^2$  ( $\chi_r^2$ ) calculated using the EXOMOP best-fitting model,  $N_{\text{pts}}$ , and  $k$ .

temperature, eccentricity, orbital period) can be directly measured (e.g. Charbonneau et al. 2007). Additionally, multiple-band photometry of a TEP system can be used to constrain the composition of an exoplanet’s atmosphere (Seager & Sasselov 2000; Brown 2001; Hubbard et al. 2001; Charbonneau et al. 2002). The absorption properties of different species in a planetary atmosphere vary with wavelength, causing an observable variation in the planet’s radius. Photometric light-curve analysis can also be used to search for transit timing variations (TTVs). TTVs can indicate additional bodies in a TEP system or an unstable orbit caused by tidal forces from the star (e.g. Miralda-Escudé 2002; Holman & Murray 2005; Holman et al. 2010).

In this work, we present new ground-based photometric data of 11 confirmed transiting hot Jupiter exoplanets. We describe and perform TEP modelling techniques (Sections 2 and 3) to determine the orbital and physical parameters of each system, and compare our results with previous published results to confirm and improve the planetary parameters (Sections 4 and 5). For each system, we combine our results with previous work to search for a variation in planetary radius with wavelength (Section 6), which could indicate Rayleigh scattering, the presence of an absorptive atmosphere, or clouds. Finally, we combine our mid-transit data with previous observations to recalculate each system’s orbital period and search for TTVs.

## 2 OBSERVATIONS AND DATA REDUCTION

All the observations were performed at the University of Arizona’s Steward Observatory 1.55-m Kuiper Telescope on Mt Bigelow near Tucson, Arizona. The Mont4k CCD has a field of view of 9.7 arcmin $\times$ 9.7 arcmin and contains a 4096  $\times$  4096 pixel sensor. The CCD is binned 3  $\times$  3 to achieve a resolution of 0.43 arcsec pixel<sup>-1</sup> and binning reduces the read-out time to  $\sim$ 10 s. Our observations were taken with the Bessell *U* (303–417 nm), Harris *B* (360–500 nm) and Harris *R* (550–900 nm) photometric band filters. To ensure accurate timing in these observations, the clocks were synchronized with a GPS every few seconds. In all the data sets, the average shift in the centroid of our targets is less than 0.6 pixels (0.26 arcsec) due to excellent autoguiding (the maximum is 3.4 pixels). This telescope has been used extensively in exo-

planet transit studies (Dittmann et al. 2009a,b, 2010, 2012; Scuderi et al. 2010; Teske et al. 2013; Turner et al. 2013, 2016b; Biddle et al. 2014; Pearson, Turner & Sagan 2014; Zellem et al. 2015). A summary of all our observations are displayed in Table 1.

To reduce the data and create the light curves, we use the reduction pipeline EXODRPL<sup>1</sup> (Pearson et al. 2014). Each of our images are bias-subtracted and flat-fielded with 10 biases and flats. To produce the light curve for each observation, we perform aperture photometry (using `phot` in the IRAF<sup>2</sup> DAOPHOT package) by measuring the flux from our target star as well as the flux from eight different reference stars with 110 different circular aperture radii. The aperture radii sizes we explore are different for every observation due to changes in seeing conditions. For the analysis, a constant sky annulus for every night of observation of each target is chosen (a different sky annulus is used depending on the seeing and the crowdedness of the target field) to measure the brightness of the sky during the observations. We reduce the risk of contamination by making sure no stray light from the target star or other nearby stars falls in the chosen aperture. A synthetic reference light curve is produced by averaging the light curves from our reference stars. The final light curve of each date is normalized by dividing by this synthetic light curve to correct for any systematic differences from atmospheric variations (i.e. airmass) throughout the night. Every combination of reference stars and aperture radii are considered and we systematically choose the best aperture and reference stars by minimizing the scatter in the out-of-transit (OoT) data points. The 1 $\sigma$  error bars on the data points include the readout noise, flat-fielding errors and Poisson noise. The final light curves are presented in Figs 1–3. The data points of all our transits are available in electronic form (see Table 2). For all the transits, the OoT baselines have a photometric root-mean-squared (RMS) value between 1.13 and 7.76 mmag.

<sup>1</sup> <https://sites.google.com/a/email.arizona.edu/kyle-pearson/exodrpl>

<sup>2</sup> IRAF is distributed by the National Optical Astronomy Observatory, which is operated by the Association of Universities for Research in Astronomy, Inc., under cooperative agreement with the National Science Foundation.

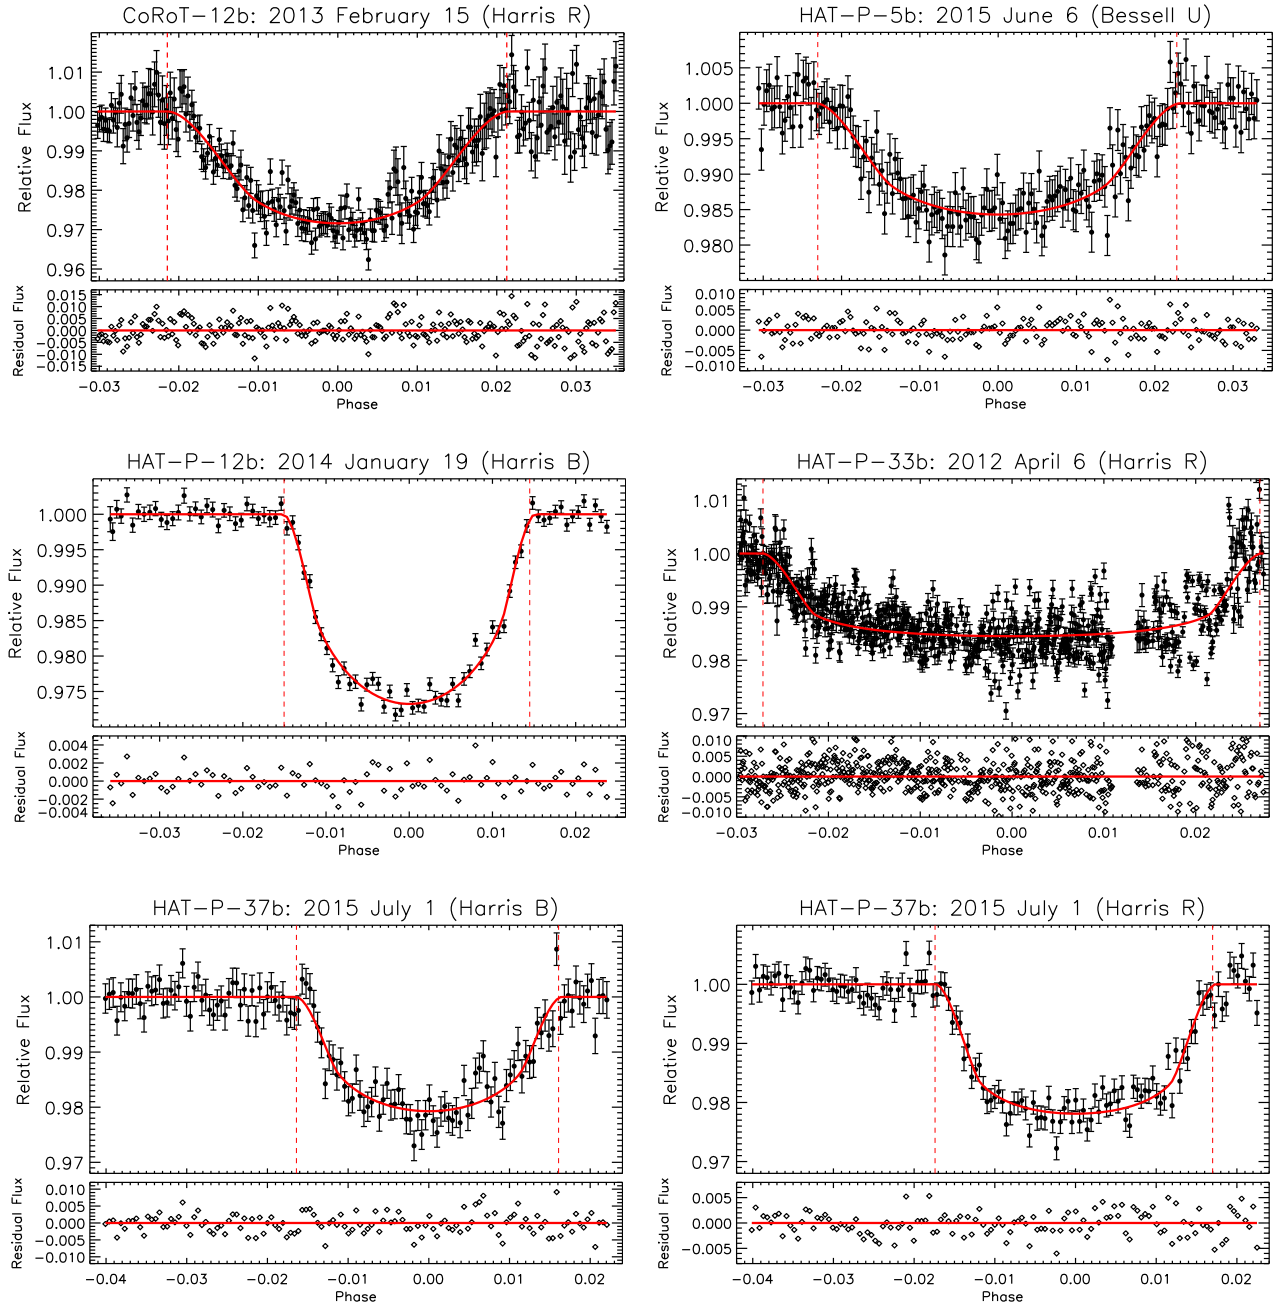

**Figure 1.** Light curves of CoRoT-12b, HAT-P-5b, HAT-P-12b, HAT-P-33b and HAT-P-37b. The  $1\sigma$  error bars include the readout noise, the Poisson noise and the flat-fielding error. The best-fitting models obtained from the EXOplanet Modeling Package (EXOMOP) are shown as a solid red line. The model predicted ingress and egress points from EXOMOP are shown as dashed red vertical lines. The residuals (light curve – EXOMOP model) are shown in the second panel. See Table 1 for the cadence, out-of-transit RMS flux, and residual RMS flux for each light curve. The data points for all the transits are available in electronic form (see Table 2).

### 3 LIGHT CURVE ANALYSIS

To find the best fit to the light curves, we use the EXOplanet Modeling Package (EXOMOP; Pearson et al. 2014; Turner et al. 2016b),<sup>3</sup> which utilizes the analytic equations of Mandel & Agol (2002) to generate a model transit. For a complete description of EXOMOP,

<sup>3</sup> EXOMOPv7.0 is used in the analysis and is available on Github at <https://github.com/astrojake/EXOMOP>.

see Pearson et al. (2014) and Turner et al. (2016b). The  $\chi^2$ -fitting statistic for the model light curve used in EXOMOP is

$$\chi^2 = \sum_{i=1}^{N_{\text{pts}}} \left[ \frac{f_i(\text{obs}) - f_i(\text{model})}{\sigma_i(\text{obs})} \right]^2 \quad (1)$$

where  $N_{\text{pts}}$  is the total number of data points (Table 1),  $f_i(\text{obs})$  is the observed flux at time  $i$ ,  $\sigma_i(\text{obs})$  is the error in the observed flux and  $f_i(\text{model})$  is the calculated model flux.

EXOMOP uses the following procedure to find a best fit to the data. A Levenberg–Marquardt (LM) non-linear least squares

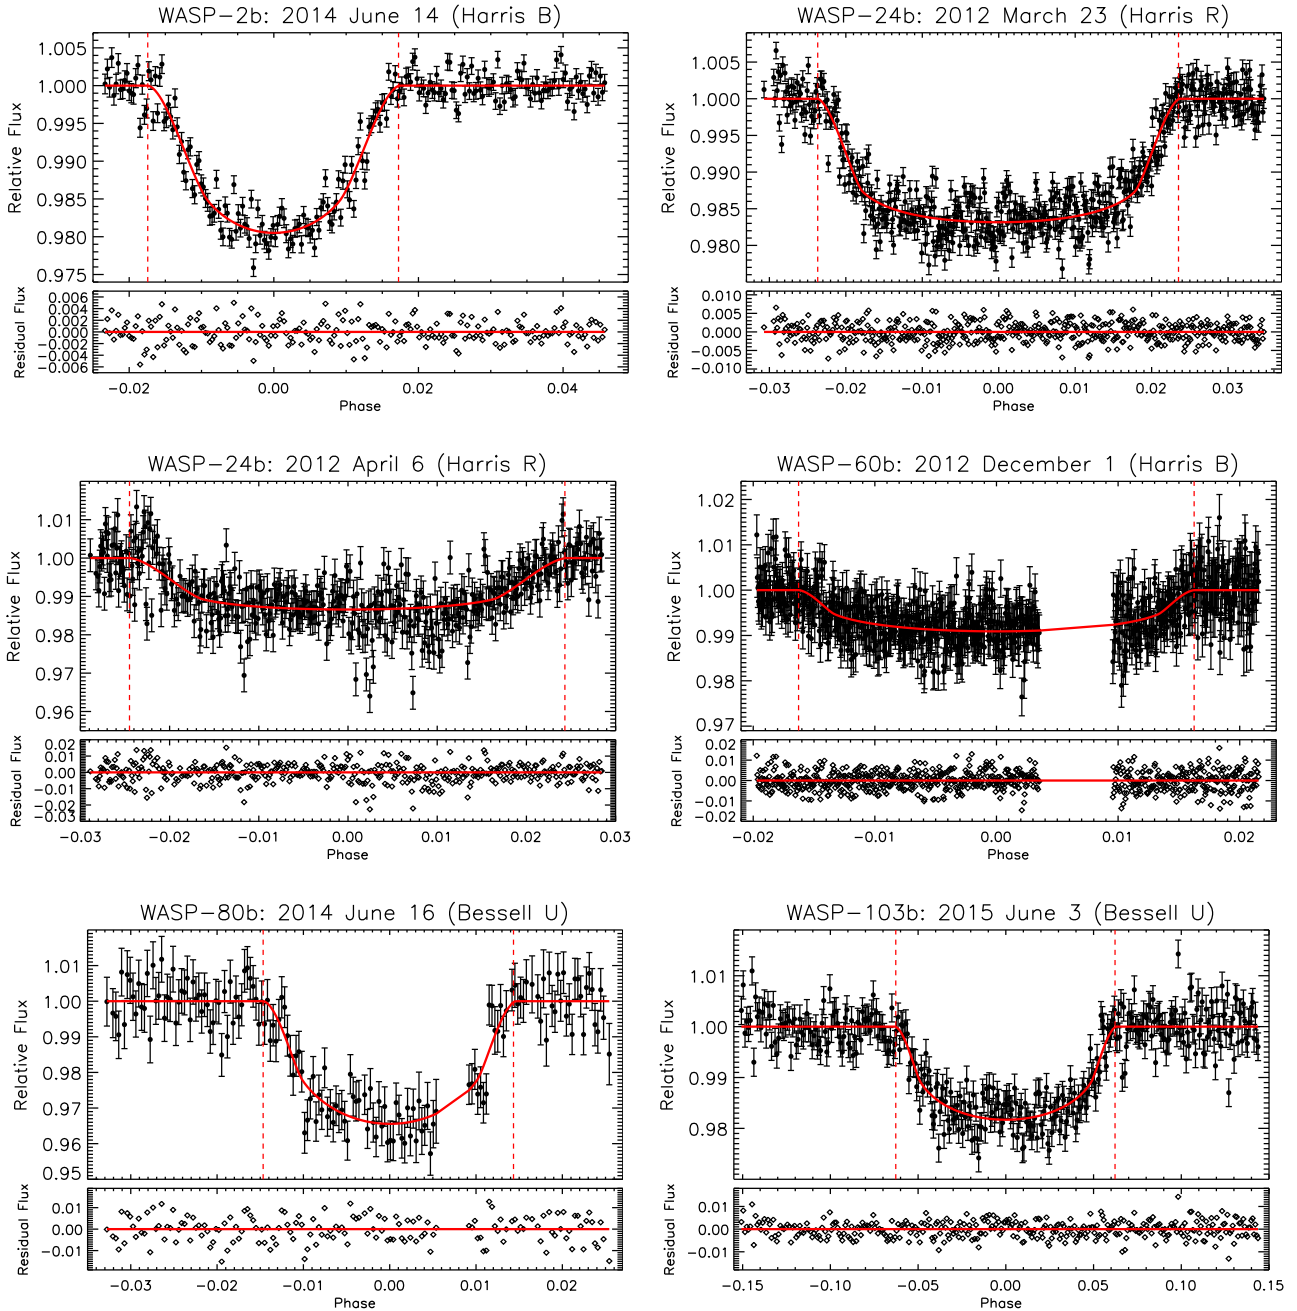

**Figure 2.** Light curves of WASP-2b, WASP-24b, WASP-60b, WASP-80b and WASP-103b. Other comments are the same as Fig. 1.

minimization (MPFIT; Markwardt 2009; Press et al. 1992) is performed on the data and a bootstrap Monte Carlo technique (Press et al. 1992) is used to calculate robust errors of the LM fitted parameters. Additionally, a Differential Evolution Markov Chain Monte Carlo (DE-MCMC; Braak 2006; Eastman, Gaudi & Agol 2013) analysis is used to model the data. The fitted parameters that have the highest error bars from either the LM or DE-MCMC best-fitting model are used in the analysis. In every case, both models find results within  $1\sigma$  of each other. Additionally, EXOMOP uses the residual permutation (rosary bead; Southworth 2008), time-averaging (Pont, Zucker & Queloz 2006) and wavelet (Carter & Winn 2009) methods to assess the importance of red noise in both fitting methods. Not accounting for red noise in the data underestimates the fitted parameters (Pont et al. 2006; Carter & Winn 2009). In order to be

conservative, the red noise method which produces the largest errors is used to inflate the errors in the fitted parameters. Finally, in order to compensate for underestimated observational errors, we multiply the error bars of the fitted parameters by  $\sqrt{\chi_r^2}$  when the reduced chi-squared ( $\chi_r^2$ ) of the data (Table 1) is greater than unity (e.g. Bruntt et al. 2006; Southworth, Wheatley & Sams 2007a; Southworth, Bruntt & Buzasi 2007b; Southworth 2008; Barnes et al. 2013; Turner et al. 2016b).

EXOMOP uses the Bayesian Information Criterion (BIC; Schwarz 1978) to assess over-fitting of the data. The BIC is defined as

$$\text{BIC} = \chi^2 + k \ln N_{\text{pts}}, \quad (2)$$

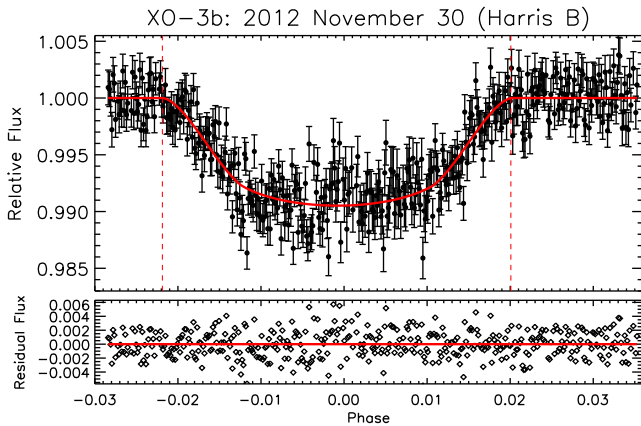

**Figure 3.** Light curve of XO-3b. Other comments are the same as Fig. 1.

where  $\chi^2$  is calculated for the best-fitting model (equation 1) and  $k$  is the number of free parameters (Table 1) in the model fit [ $f_i(\text{model})$ ]. The power of the BIC is the penalty for a higher number of fitted model parameters, making it a robust way to compare different best-fitting models. The preferred model is the one that produces the lowest BIC value.

Each transit is modelled with EXOMOP using 10 000 iterations for the LM model and 20 chains and  $20^6$  links for the DE-MCMC model. The Gelman–Rubin statistic (Gelman & Rubin 1992) is used to ensure chain convergence (Ford 2006) in the MCMC model. During the analysis of each transit, the mid-transit time ( $T_c$ ), planet-to-star radius ( $R_p/R_*$ ), scaled semi-major axis ( $a/R_*$ ) and inclination ( $i$ ) are set as free parameters. The previously published values for  $R_p/R_*$ ,  $i$  and  $a/R_*$  are used as priors for the LM model (Table 3). The results of the LM fit are used as the prior for the DE-MCMC. The eccentricity ( $e$ ), argument of periastron ( $\omega$ ), and period ( $P_p$ ) of each of the planets are fixed (see Table 3 for their values) in the analysis because these parameters have minimal effect on the overall shape of the light curve. The linear and quadratic limb darkening coefficients in each filter are taken from Claret & Bloemen (2011) and interpolated to the stellar parameters of the host stars (see Table 4) using the EXOFAST applet<sup>4</sup> (Eastman et al. 2013). In addition, a linear or quadratic least squares fit is modelled to the OoT baseline simultaneously with the Mandel & Agol (2002) model. The BIC is used to determine whether to include any baseline fit in the best-fitting model and the baseline with the lowest BIC value is always chosen.

The light-curve parameters obtained from the EXOMOP analysis and the derived transit durations are summarized in Table 5. The modelled light curves can be found in Figs 1–3 and the physical parameters for our targets are derived as outlined in Section 4 (Tables 6 and 7). A thorough description of the modelling and results of each system can be found in Section 5.

## 4 PHYSICAL PROPERTIES OF THE SYSTEMS

We use the results of our light-curve modelling with EXOMOP combined with other measurements in the literature to calculate the planetary mass (e.g. Winn 2011; Seager 2011), radius, density, surface gravity (e.g. Southworth et al. 2007a), modified equilibrium temperature (e.g. Southworth 2010), Safronov number (e.g. Safronov 1972; Southworth 2010) and atmospheric scaleheight (e.g. Seager 2011;

de Wit & Seager 2013). An updated period and ephemeris is also calculated and is described in detail in Section 4.1. To calculate the physical parameters we use the values from the modelling ( $P_p$ ,  $R_p/R_*$ ,  $i$ ,  $a/R_*$ ), and for the orbital ( $e$ ) and host star parameters (radial velocity amplitude, mass, radius, equilibrium temperature) we use the values found in the literature. When calculating the scaleheight, the mean molecular weight in the planet’s atmosphere was set to 2.3 assuming an H/He-dominated atmosphere (de Wit & Seager 2013). The physical parameters of all our systems can be found in Tables 6 and 7.

### 4.1 Period determination

By combining our mid-transit times found using EXOMOP with previously published mid-transit times, we can refine the orbital period of the targets. When necessary, the mid-transit times were transformed from HJD, which is based on UTC time, into BJD, which is based on Barycentric Dynamical Time (TDB), using the online converter<sup>5</sup> by Eastman, Siverd & Gaudi (2010). A refined ephemeris for each target is found by performing a weighted linear least-squares analysis using the following equation:

$$T_c = T_c(0) + P_p \times E, \quad (3)$$

where  $T_c(0)$  is the mid-transit time at the discovery epoch measured in  $\text{BJD}_{\text{TDB}}$ ,  $P_p$  is the orbital period of the target and  $E$  is the integer number of cycles after their discovery paper. See Tables 6 and 7 for an updated  $T_c$  and  $P_b$  for each system.

For every system, we also made observation minus calculation mid-transit time (O-C) plots in order to search for any TTVs due to other bodies in the system. We used the derived period and ephemeris found in Tables 6 and 7 and equation (3) for the calculated mid-transit times. The O-C plots can be found in Figs 4 and 5. The transit timing analysis for all our targets can be found in Table 8 (the entire table can be found online). We do not observe any significant TTVs in our data with the exception of a  $3.8\sigma$  deviation for WASP-80b for our observed transit. Since the possible TTV is only one data point and may be caused by an unknown systematic error, more observations of WASP-80b are needed to confirm this result.

## 5 INDIVIDUAL SYSTEMS

### 5.1 CoRoT-12b

CoRoT-12b was discovered by the *CoRoT* satellite (Carone et al. 2012) and was confirmed by follow-up photometry and radial-velocity measurements (Gillon et al. 2010). CoRoT-12b is an inflated hot Jupiter with a low density which is well predicted by standard models (Fortney, Marley & Barnes 2007) for irradiated planets (Gillon et al. 2010).

We observed a transit of CoRoT-12b on 2013 February 15 with the Harris *R* filter (Fig. 1). We find an  $R_p/R_*$  value  $4.6\sigma$  greater than the discovery value. Our derived physical parameters are in good agreement with Gillon et al. (2010). We find a planetary radius within  $1.3\sigma$  of the previously calculated value and a planetary mass within  $1\sigma$  (Tables 5 and 6).

<sup>4</sup> <http://astroutils.astronomy.ohio-state.edu/exofast/limbdark.shtml>

<sup>5</sup> <http://astroutils.astronomy.ohio-state.edu/time/hjd2bjd.html>

**Table 2.** Photometry of all our light curves.

| Planet name | Filter   | Time (HJD <sub>UTC</sub> ) | Relative flux | Error bars | CCD X-Pos | CCD Y-Pos | Median airmass |
|-------------|----------|----------------------------|---------------|------------|-----------|-----------|----------------|
| CoRoT-12b   | Harris-R | 2456338.584736             | 0.996 48      | 0.003 327  | 529.411   | 635.689   | 1.513 072      |
| CoRoT-12b   | Harris-R | 2456338.585434             | 0.998 034     | 0.003 213  | 527.611   | 634.955   | 1.507 972      |
| CoRoT-12b   | Harris-R | 2456338.586133             | 0.998 494     | 0.003 108  | 528.101   | 634.46    | 1.502 944      |
| CoRoT-12b   | Harris-R | 2456338.586831             | 0.995 49      | 0.003 094  | 528.858   | 634.639   | 1.497 979      |

*Notes.* This table is available in its entirety in machine-readable form in the online journal. A portion is shown here for guidance regarding its form and content.

**Table 3.** Parameters fixed for the light-curve fitting using EXOMOP.

| Planet    | Period ( $P_p$ )<br>(d) | $a/R_*^a$ | Inclination ( $i$ ) <sup>a</sup><br>(°) | Eccentricity ( $e$ ) | Omega ( $\omega$ )<br>(°) | Source |
|-----------|-------------------------|-----------|-----------------------------------------|----------------------|---------------------------|--------|
| CoRoT-12b | 2.828 042               | 7.7402    | 85.48                                   | 0.070                | 105                       | 1      |
| HAT-P-5b  | 2.788 491               | 7.5       | 86.75                                   | 0                    | 0                         | 2      |
| HAT-P-12b | 3.213 089               | 11.7371   | 89.915                                  | 0                    | 0                         | 3      |
| HAT-P-33b | 3.474 474               | 6.56      | 87.2                                    | 0.148                | 96                        | 4      |
| HAT-P-37b | 2.797 436               | 9.32      | 86.9                                    | 0.058                | 164                       | 5      |
| WASP-2b   | 2.152 218 12            | 8.06      | 84.89                                   | 0                    | 0                         | 6      |
| WASP-24b  | 2.341 213               | 5.98      | 83.64                                   | 0                    | 0                         | 7      |
| WASP-60b  | 4.305 0011              | 10        | 87.9                                    | 0                    | 0                         | 8      |
| WASP-80b  | 3.067 85                | 12.989    | 89.92                                   | 0.07                 | 0                         | 9      |
| WASP-103b | 0.925 542               | 2.978     | 86.3                                    | 0                    | 0                         | 10     |
| XO-3b     | 3.191 524               | 7.07      | 84.2                                    | 0.26                 | 345.8                     | 11     |

<sup>a</sup>These parameter values were not fixed in the final analysis but were used as priors for the MCMC.

References. (1) Gillon et al. (2010), (2) Bakos et al. (2007), (3) Lee et al. (2012), (4) Hartman et al. (2011), (5) Bakos et al. (2012), (6) Becker et al. (2013), (7) Street et al. (2010), (8) Hébrard et al. (2013), (9) Triaud et al. (2013), (10) Gillon et al. (2014), (11) Winn et al. (2008).

**Table 4.** Limb darkening coefficients for the light-curve fitting using EXOMOP.

| Planet    | Filter   | Linear coefficient <sup>a</sup> | Quadratic coefficient <sup>a</sup> | $T_{\text{eff}}$ [K] | [Fe/H] | $\log g$ [cgs] | Source |
|-----------|----------|---------------------------------|------------------------------------|----------------------|--------|----------------|--------|
| CoRoT-12b | <i>R</i> | 0.394 409 01                    | 0.266 822 49                       | 5675                 | 0.160  | 4.375          | 1      |
| HAT-P-5b  | <i>U</i> | 0.755 520 25                    | 0.093 484 300                      | 5960                 | 0.240  | 4.368          | 2      |
| HAT-P-12b | <i>B</i> | 0.937 747 24                    | −0.083 4328 83                     | 4650                 | −0.290 | 4.610          | 3      |
| HAT-P-33b | <i>R</i> | 0.276 288 72                    | 0.322 951 69                       | 6401                 | 0.05   | 4.15           | 4      |
| HAT-P-37b | <i>B</i> | 0.728 327 60                    | 0.097 543 998                      | 5500                 | 0.03   | 4.52           | 5      |
| HAT-P-37b | <i>R</i> | 0.419 676 40                    | 0.250 208 40                       | 5500                 | 0.03   | 4.52           | 5      |
| WASP-2b   | <i>B</i> | 0.822 721 26                    | 0.018 632 333                      | 5200                 | 0.100  | 4.537          | 2      |
| WASP-24b  | <i>R</i> | 0.314 107 56                    | 0.306 245 87                       | 6080                 | −0.002 | 4.26           | 6      |
| WASP-60b  | <i>B</i> | 0.614 553 58                    | 0.184 772 01                       | 5900                 | −0.040 | 4.20           | 7      |
| WASP-80b  | <i>U</i> | 0.826 638 25                    | −0.029 831 771                     | 4150                 | −0.140 | 4.60           | 8      |
| WASP-103b | <i>U</i> | 0.655 369 32                    | 0.178 755 91                       | 6110                 | 0.060  | 4.22           | 9      |
| XO-3b     | <i>B</i> | 0.504 499 54                    | 0.258 970 27                       | 6429                 | −0.177 | 3.950          | 10     |

<sup>a</sup>The limb darkening coefficients are taken from Claret & Bloemen (2011) and interpolated to the stellar parameters of their host star using EXOFAST.

References. (1) Gillon et al. (2010), (2) Torres, Winn & Holman (2008), (3) Hartman et al. (2009), (4) Hartman et al. (2011), (5) Bakos et al. (2012), (6) Street et al. (2010), (7) Hébrard et al. (2013), (8) Triaud et al. (2013), (9) Gillon et al. (2014), (10) Johns-Krull et al. (2008).

## 5.2 HAT-P-5b

HAT-P-5b is a hot Jupiter discovered by the HATNet project which orbits a slightly metal-rich star (Bakos et al. 2007). Follow-up multi-colour transit observations of HAT-P-5b by Southworth et al. (2012) confirmed the existence of the planet and searched for a variation in planetary radius with wavelength. A significantly larger radius was found in the *U*-band than expected from Rayleigh scattering alone, which the authors suggest may be due to an unknown systematic error.

We observed a transit of HAT-P-5b on 2015 June 6 with the Bessell *U* filter (Fig. 1). Our derived physical parameters are in agreement with previous literature (Tables 5 and 6). We derive a *U*-band radius consistent with a weighted average of radii taken from 350–733 nm within  $1\sigma$  (Table 9; Fig. 6). The error on our

*U*-band observation is too large to determine if the observation by Southworth et al. (2012) in the same band may have an unknown systematic error (as suggested by them). Our calculated period is in good agreement with the value found by Southworth et al. (2012) with a similar uncertainty.

## 5.3 HAT-P-12b

HAT-P-12b is a low density, sub-Saturn mass planet discovered by the HAT survey (Hartman et al. 2009). Multiple photometric studies have further refined the system's parameters and searched for TTVs (Sada et al. 2012; Sokov et al. 2012; Lee et al. 2012; Line et al. 2013; Mallonn et al. 2015b; Sing et al. 2016; Sada & Ramón-Fox 2016). Sing et al. (2016) find a strong optical scattering slope from blue

**Table 5.** Light-curve parameters derived in this study using EXOMOP.

|                                     |                                              |                        |                                              |                                                 |                        |
|-------------------------------------|----------------------------------------------|------------------------|----------------------------------------------|-------------------------------------------------|------------------------|
| Planet                              | CoRoT-12b                                    | HAT-P-5b               | HAT-P-12b                                    | HAT-P-33b                                       | HAT-P-37b              |
| Date                                | 2013 February 15                             | 2015 June 6            | 2014 January 19                              | 2012 April 6                                    | 2015 July 1            |
| Filter <sup>a</sup>                 | <i>R</i>                                     | <i>U</i>               | <i>B</i>                                     | <i>R</i>                                        | <i>B</i>               |
| $T_c$ (BJD <sub>TDB</sub> -2450000) | 6338.670 97 ± 0.000 74                       | 7180.826 58 ± 0.000 76 | 6677.974 82 ± 0.000 47                       | 6024.717 46 ± 0.0012                            | 7205.913 76 ± 0.000 54 |
| $R_p/R_*$                           | 0.1645 <sup>+0.0038</sup> <sub>-0.0040</sub> | 0.1225 ± 0.0051        | 0.1386 <sup>+0.0013</sup> <sub>-0.0014</sub> | 0.1152 ± 0.0017                                 | 0.1253 ± 0.0021        |
| $a/R_*$                             | 6.59 <sup>+0.31</sup> <sub>-0.29</sub>       | 6.05 ± 0.44            | 11.86 ± 0.57                                 | 5.67 ± 0.13                                     | 10.82 ± 0.91           |
| Inclination (°)                     | 83.54 ± 0.71                                 | 83.31 ± 1.11           | 90.98 ± 1.09                                 | 90.08 ± 3.43                                    | 89.991.83              |
| Duration (mins)                     | 174.0 ± 1.4                                  | 184.1 ± 1.9            | 139.8 ± 4.4                                  | 270.45 ± 0.48                                   | 132.8 ± 2.7            |
| Red noise (mmag)                    | 0.0001                                       | 1.60                   | 0.21                                         | 0.78                                            | 0.0001                 |
| OoT baseline function               | None                                         | None                   | Quadratic                                    | None                                            | None                   |
| Planet                              | HAT-P-37b                                    | HAT-P-37b              | WASP-2b                                      | WASP-24b                                        | WASP-24b               |
| Date                                | 2015 July 1                                  | Weighted average       | 2014 June 14                                 | 2012 March 23                                   | 2012 April 6           |
| Filter <sup>a</sup>                 | <i>R</i>                                     | –                      | <i>B</i>                                     | <i>R</i>                                        | <i>R</i>               |
| $T_c$ (BJD <sub>TDB</sub> -2450000) | 7205.913 25 ± 0.000 56                       | –                      | 6823.838 39 ± 0.000 55                       | 6010.8437 ± 0.0017                              | 6024.8910 ± 0.0015     |
| $R_p/R_*$                           | 0.1361 ± 0.0028                              | 0.1291 ± 0.0017        | 0.1383 ± 0.0049                              | 0.1139 ± 0.0015                                 | 0.1113 ± 0.0043        |
| $a/R_*$                             | 9.14 ± 0.63                                  | 9.68 ± 0.52            | 8.05 ± 1.21                                  | 7.42 ± 0.15                                     | 6.06 ± 0.73            |
| Inclination (°)                     | 86.73 ± 0.93                                 | 87.4 ± 0.82            | 84.86 ± 1.61                                 | 90.0 ± 5.4                                      | 83.95 ± 2.74           |
| Duration (mins)                     | 140.5 ± 2.7                                  | 136.6 ± 1.9            | 108.4 ± 1.4                                  | 159.5 ± 0.6                                     | 165.0 ± 0.6            |
| Red noise (mmag)                    | 0.34                                         | –                      | 0.00                                         | 0.27                                            | 0.60                   |
| OoT baseline function               | None                                         | –                      | Quadratic                                    | Quadratic                                       | Linear                 |
| Planet                              | WASP-24b                                     | WASP-60b               | WASP-80b                                     | WASP-103b                                       | XO-3b                  |
| Date                                | Weighted average                             | 2012 December 1        | 2014 June 16                                 | 2015 June 3                                     | 2012 November 30       |
| Filter <sup>a</sup>                 | <i>R</i>                                     | <i>B</i>               | <i>U</i>                                     | <i>U</i>                                        | <i>B</i>               |
| $T_c$ (BJD <sub>TDB</sub> -2450000) | –                                            | 6263.6330 ± 0.0012     | 6824.886 61 ± 0.000 91                       | 7177.8222 <sup>+0.0015</sup> <sub>-0.0009</sub> | 6262.6566 ± 0.0015     |
| $R_p/R_*$                           | 0.1136 ± 0.0014                              | 0.0852 ± 0.0036        | 0.1615 ± 0.0033                              | 0.1181 ± 0.0016                                 | 0.0968 ± 0.0023        |
| $a/R_*$                             | 7.36 ± 0.15                                  | 9.49 ± 1.81            | 12.85 ± 0.42                                 | 2.90 ± 0.05                                     | 5.68 ± 0.51            |
| Inclination (°)                     | 85.19 ± 2.44                                 | 87.48 ± 2.83           | 90.0 ± 1.8                                   | 90.00 ± 0.18                                    | 81.75 ± 0.77           |
| Duration (mins)                     | 162.1 ± 0.4                                  | 201.9 ± 0.3            | 126.7 ± 2.2                                  | 167.6 ± 1.5                                     | 185.4 ± 0.9            |
| Red noise (mmag)                    | –                                            | 0.00                   | 0.01                                         | 0.001                                           | 0.001                  |
| OoT baseline function               | –                                            | None                   | Quadratic                                    | Linear                                          | None                   |

<sup>a</sup>Filter: *U* is the Bessell *U* (303–417 nm), *B* is the Harris *B* (330–550 nm) and *R* is the Harris *R* (550–900 nm).

to near-IR wavelengths using *Hubble Space Telescope* and *Spitzer Space Telescope* transmission spectrum data.

We observed a transit of HAT-P-12b on 2014 January 19 using the Harris *B* filter (Fig. 1). We derive an optical  $R_p/R_*$  within  $1\sigma$  of previously derived radii at optical wavelengths (Table 9; Fig. 6). These results are consistent with the planet having high clouds in its atmosphere (e.g. Seager & Sasselov 2000; Kreidberg et al. 2014) and the finding by Line et al. (2013) that HAT-P-12b has a cloudy atmosphere. We also find a period similar to Mallonn et al. (2015b).

#### 5.4 HAT-P-33b

HAT-P-33b is an inflated hot Jupiter orbiting a high-jitter star (Hartman et al. 2011). The high-jitter is believed to be caused by convective inhomogeneities in the host star (Saar, Butler & Marcy 1998; Hartman et al. 2011). The planetary radius and mass, which both depend on eccentricity, and the stellar parameters are not well constrained due to the large jitter ( $20 \text{ m s}^{-1}$ ). HAT-P-33b's radius is either 1.7 or 1.8  $R_{\text{Jup}}$  assuming a circular or eccentric orbit, respectively. The first follow-up observations by the Transiting Exoplanet Monitoring Project (TEMP) of HAT-P-33b confirmed the discovery parameters and detected no signs of TTVs (Wang et al. 2017).

We observed one transit of HAT-P-33b on 2012 April 6 with the Harris *R* filter (Fig. 1). We find an *R*-band  $R_p/R_*$  value which is larger by  $3.4\sigma$  from the discovery  $R_p/R_*$  (Table 9). Follow-up observations are needed to determine the cause of this discrepancy.

#### 5.5 HAT-P-37b

HAT-P-37b was identified by the HATNet survey and was confirmed by high-resolution spectroscopy and further photometric observations (Bakos et al. 2012). HAT-P-37b is a hot Jupiter with a planetary mass of  $1.169 \pm 0.103 M_{\text{Jup}}$ , a radius of  $1.178 \pm 0.077 R_{\text{Jup}}$ , and a period of  $2.797 436 \pm 0.000 007 \text{ d}$ . Additional follow-up observations by Maciejewski et al. (2016) confirmed these planetary parameters.

We obtained two transits of HAT-P-37b on 2015 July 1 with the Harris *B* and *R* filters (Fig. 1). We derive an  $R_p/R_*$  for each filter which differ by  $1.7\sigma$ , with a larger radius in the *R* band (Table 9; Fig. 6). The *B*-band  $R_p/R_*$  is smaller by  $2.85\sigma$  from the near-IR  $R_p/R_*$  (Table 9; Bakos et al. 2012). Our derived *R*-band  $R_p/R_*$  value agrees within  $1\sigma$  of the Sloan *i* band value obtained by Bakos et al. (2012). Near-UV observations are needed to determine if the slope between the *B* and *R* filters is real or an unknown systematic in the data. Our other derived physical parameters agree with previous literature to within  $1\sigma$  (Tables 5 and 6). We also calculate a refined period with a factor of 6 decrease in error.

#### 5.6 WASP-2b

WASP-2b is a short-period hot Jupiter discovered by the WASP survey and confirmed by radial-velocity measurements taken with the SOPHIE spectrograph (Collier Cameron et al. 2007). Extensive photometry and radial velocity measurements have been performed on WASP-2b, further refining its system parameters (Charbonneau et al. 2007; Daemgen et al. 2009; Southworth et al. 2010;

**Table 6.** Physical parameters derived in this study for CoRoT-12b, HAT-P-5b, HAT-P-12b, HAT-P-33b, HAT-P-37b, WASP-2b, WASP-24b, WASP-60b and WASP-80b.

| Planet                               | CoRoT-12b                   | HAT-P-5b                    | HAT-P-12b                   |
|--------------------------------------|-----------------------------|-----------------------------|-----------------------------|
| Date                                 | 2013 February 15            | 2015 June 6                 | 2014 January 19             |
| Period (d)                           | 2.828 051 ± 0.000 080       | 2.788 472 80 ± 0.000 000 39 | 3.213 057 61 ± 0.000 000 20 |
| $T_c(0)$ (BJD-2450000)               | 4398.628 ± 0.055            | 4241.777 16 ± 0.000 15      | 4187.856 23 ± 0.000 13      |
| $M_b$ ( $M_{\text{Jup}}$ )           | 0.922 ± 0.072               | 1.06 ± 0.12                 | 0.211 ± 0.012               |
| Our $R_b$ ( $R_{\text{Jup}}$ )       | 1.79 ± 0.15                 | 1.36 ± 0.057                | 0.949 ± 0.017               |
| Reference $R_b$ ( $R_{\text{Jup}}$ ) | 1.44 ± 0.13 (a)             | 1.26 ± 0.05 (b)             | 0.959 ± 0.029 (c)           |
| $\rho_b$ (cgs)                       | 0.200 ± 0.054               | 0.531 ± 0.088               | 0.306 ± 0.023               |
| $\log g_b$ (cgs)                     | 2.72 ± 0.12                 | 2.946 ± 0.085               | 2.77 ± 0.052                |
| $T'_{\text{eq}}$ (K)                 | 1563 ± 22                   | 1713 ± 29                   | 954 ± 12                    |
| $\Theta$                             | 0.0327 ± 0.0054             | 0.0431 ± 0.0064             | 0.0235 ± 0.0019             |
| $a$ (au)                             | 0.0342 ± 0.0032             | 0.0320 ± 0.0023             | 0.0386 ± 0.0019             |
| $H$ (km)                             | 1521 ± 402                  | 979 ± 193                   | 822 ± 98                    |
| Planet                               | HAT-P-33b                   | HAT-P-37b                   | WASP-2b                     |
| Date                                 | 2012 April 6                | 2015 July 1                 | 2014 June 14                |
| Period (d)                           | 3.474 4750 ± 0.000 000 37   | 2.797 441 49 ± 0.000 000 83 | 2.152 221 14 ± 0.000 000 19 |
| $T_c(0)$ (BJD-2450000)               | 5110.927 26 ± 0.000 12      | 5616.967 10 ± 0.000 28      | 3991.515 553 ± 0.000 074    |
| $M_b$ ( $M_{\text{Jup}}$ )           | 1.26 ± 0.23                 | 1.17 ± 0.10                 | 0.880 ± 0.087               |
| Our $R_b$ ( $R_{\text{Jup}}$ )       | 1.99 ± 0.32                 | 1.16 ± 0.06                 | 1.12 ± 0.13                 |
| Reference $R_b$ ( $R_{\text{Jup}}$ ) | 1.827 ± 0.290 (d)           | 1.178 ± 0.077 (e)           | 1.043 ± 0.033 (f)           |
| $\rho_b$ (cgs)                       | 0.20 ± 0.10                 | 0.93 ± 0.17                 | 0.77 ± 0.28                 |
| $\log g_b$ (cgs)                     | 2.83 ± 0.21                 | 3.369 ± 0.088               | 3.25 ± 0.18                 |
| $T'_{\text{eq}}$ (K)                 | 1901 ± 26                   | 1250 ± 22                   | 1284 ± 20                   |
| $\Theta$                             | 0.042 ± 0.013               | 0.085 ± 0.012               | 0.058 ± 0.016               |
| $a$ (au)                             | 0.0468 ± 0.0075             | 0.0394 ± 0.0029             | 0.0312 ± 0.0056             |
| $H$ (km)                             | 1408 ± 679                  | 270 ± 54                    | 364 ± 155                   |
| Planet                               | WASP-24b                    | WASP-60b                    | WASP-80b                    |
| Date                                 | Combined                    | 2012 December 1             | 2014 June 16                |
| Period (d)                           | 2.341 218 77 ± 0.000 000 30 | 4.305 022 ± 0.000 021       | 3.067 859 25 ± 0.000 000 47 |
| $T_c(0)$ (BJD-2450000)               | 4945.589 444 ± 0.000 090    | 5747.0302 ± 0.0022          | 6125.418 034 ± 0.000 052    |
| $M_b$ ( $M_{\text{Jup}}$ )           | 1.032 ± 0.037               | 0.512 ± 0.034               | 0.551 ± 0.036               |
| Our $R_b$ ( $R_{\text{Jup}}$ )       | 1.27 ± 0.055                | 0.94 ± 0.12                 | 0.99 ± 0.24                 |
| Reference $R_b$ ( $R_{\text{Jup}}$ ) | 1.303 ± 0.047 (g)           | 0.86 ± 0.12 (h)             | 0.999 ± 0.031 (i)           |
| $\rho_b$ (cgs)                       | 0.628 ± 0.085               | 0.75 ± 0.27                 | 0.71 ± 0.51                 |
| $\log g_b$ (cgs)                     | 3.279 ± 0.057               | 3.11 ± 0.22                 | 3.22 ± 0.29                 |
| $T'_{\text{eq}}$ (K)                 | 1583 ± 27                   | 1354 ± 23                   | 817 ± 20                    |
| $\Theta$                             | 0.0566 ± 0.0043             | 0.051 ± 0.013               | 0.072 ± 0.025               |
| $a$ (au)                             | 0.0392 ± 0.0018             | 0.050 ± 0.011               | 0.0376 ± 0.0090             |
| $H$ (km)                             | 421 ± 55                    | 536 ± 274                   | 248 ± 168                   |

References. (a) Gillon et al. (2010); (b) Bakos et al. (2007); (c) Hartman et al. (2009); (d) Hartman et al. (2011); (e) Bakos et al. (2012); (f) Southworth et al. (2010); (g) Southworth et al. (2014); (h) Hébrard et al. (2013); (i) Triaud et al. (2015).

**Table 7.** Physical parameters derived in this study for WASP-103b and XO-3b.

| Planet                               | WASP-103b               | XO-3b                       |
|--------------------------------------|-------------------------|-----------------------------|
| Date                                 | 2015 June 3             | 2012 November 30            |
| Period (d)                           | 0.925 5454 ± 0.000 0010 | 3.191 531 25 ± 0.000 000 53 |
| $T_c(0)$ (BJD-2450000)               | 6459.599 48 ± 0.000 41  | 2997.722 00 ± 0.000 40      |
| $M_b$ ( $M_{\text{Jup}}$ )           | 1.484 ± 0.082           | 13.07 ± 0.66                |
| Our $R_b$ ( $R_{\text{Jup}}$ )       | 1.640 ± 0.066           | 1.403 ± 0.093               |
| Reference $R_b$ ( $R_{\text{Jup}}$ ) | 1.528 ± 0.073 (a)       | 1.217 ± 0.073 (b)           |
| $\rho_b$ (cgs)                       | 0.417 ± 0.055           | 5.87 ± 1.20                 |
| $\log g_b$ (cgs)                     | 3.114 ± 0.055           | 4.05 ± 0.11                 |
| $T'_{\text{eq}}$ (K)                 | 2537 ± 42               | 2011 ± 13                   |
| $\Theta$                             | 0.0286 ± 0.0023         | 0.519 ± 0.075               |
| $a$ (au)                             | 0.093 61 ± 0.000 78     | 0.0393 ± 0.0041             |
| $H$ (km)                             | 986 ± 125               | 90 ± 22                     |

References. (a) Gillon et al. (2014); (b) Winn et al. (2008).



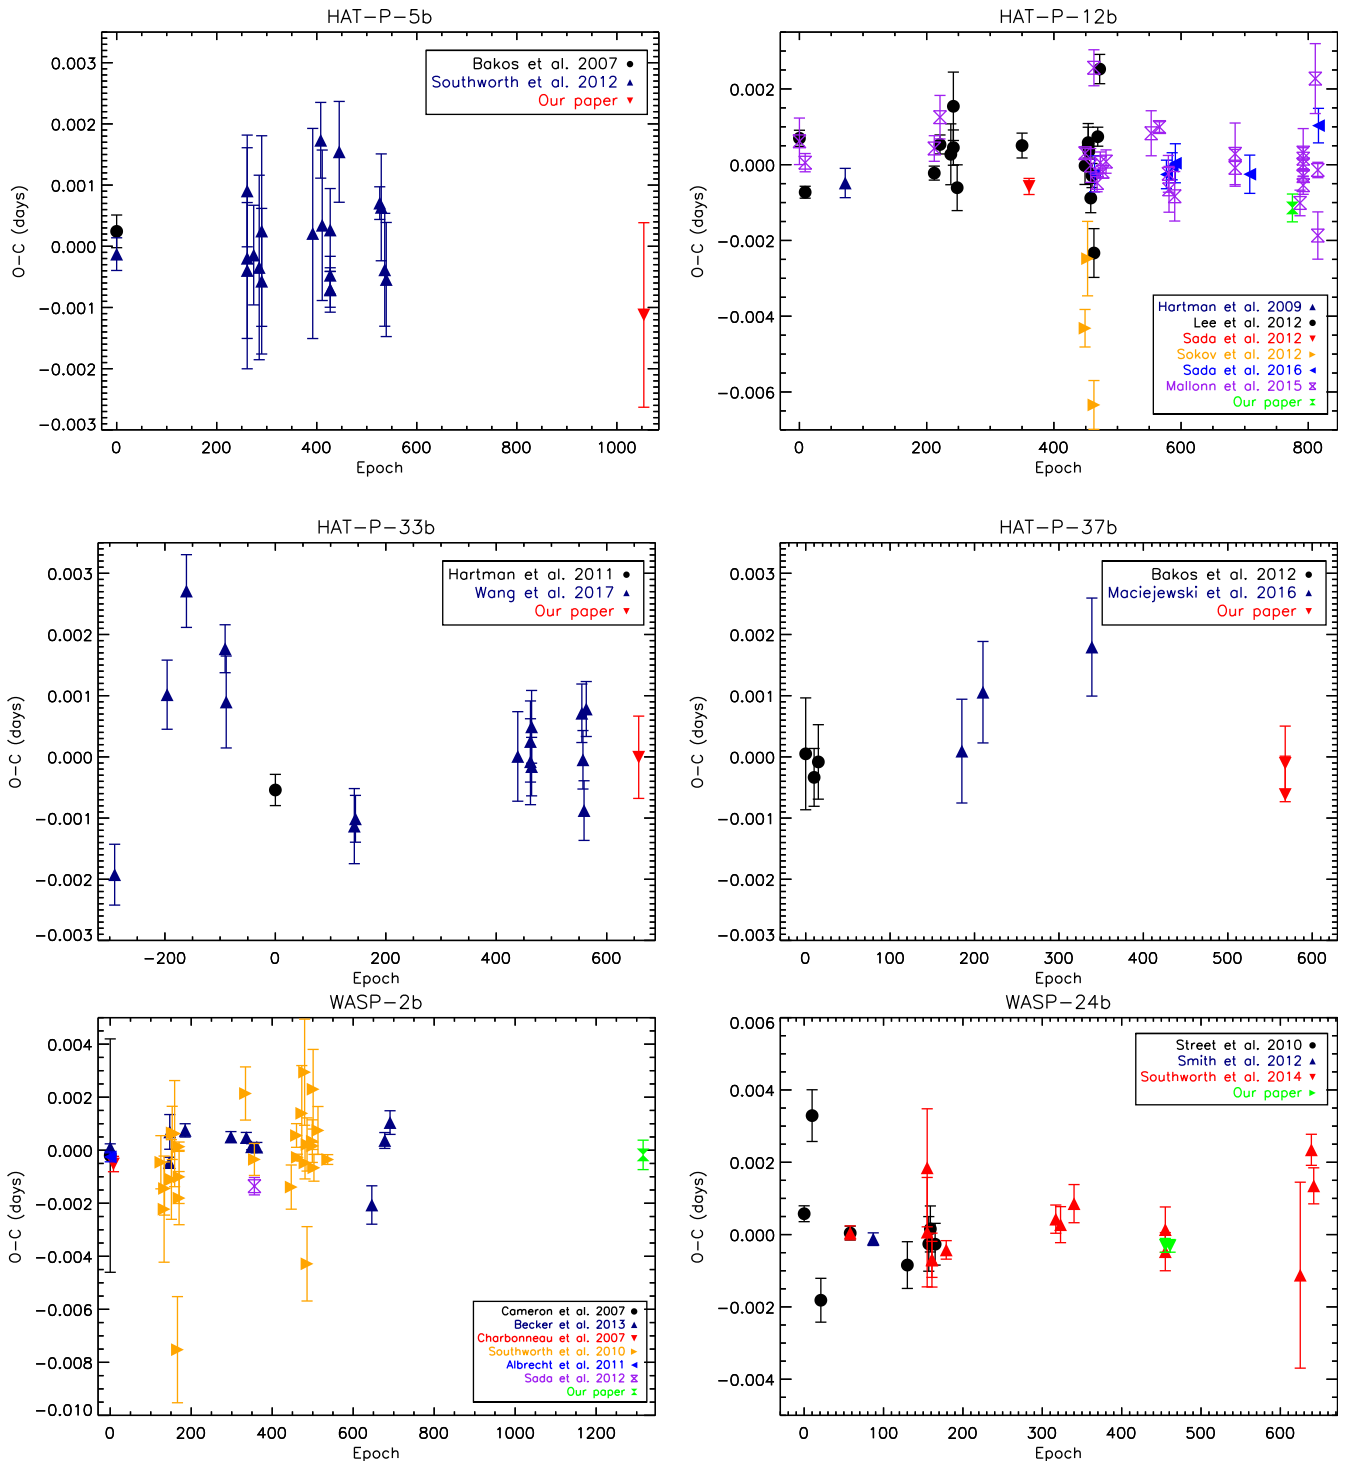

**Figure 4.** Observation minus calculation mid-transit time (O-C) plots of HAT-P-5b, HAT-P-12b, HAT-P-33b, HAT-P-37b, WASP-2b and WASP-24b from this paper and previous literature. We do not see any evidence for TTVs.

Triaud et al. 2010; Albrecht et al. 2011; Zhang et al. 2011; Husnoo et al. 2012; Sada et al. 2012; Becker et al. 2013).

We observed WASP-2b on 2014 June 14 with the Harris *B* filter (Fig. 2). Our derived physical parameters and transit depth agree with previous literature to within  $1\sigma$  and we calculate a period with a factor of 2 decrease in error (Tables 5 and 6).

## 5.7 WASP-24b

WASP-24b is a hot Jupiter detected by WASP and confirmed by radial velocity measurements and additional photometric observations (Street et al. 2010). Further photometric studies calculated improved system parameters (Southworth et al. 2014), and radial velocity measurements were used to determine that the planet exhibits



**Table 8.** Results of the transit timing analysis.

| Planet name | $T_c$ (BJD <sub>TDB</sub> ) | $T_c$ error (d) | Epoch | O-C (d)          | O-C error (d) | Source               |
|-------------|-----------------------------|-----------------|-------|------------------|---------------|----------------------|
| CoRoT-12b   | 2456338.67097               | 0.00074         | 686   | −0.000 0012      | 0.055         | This paper           |
| CoRoT-12b   | 2454398.628                 | 0.055           | 0     | 0.000 000 000 46 | 0.078         | Gillon et al. (2010) |

*Notes.* This table is available in its entirety in machine-readable form in the online journal. A portion is shown here for guidance regarding its form and content.

**Table 9.**  $R_p/R_*$  and effective central wavelength  $\lambda_{\text{eff}}$  from this paper and previous literature for all targets.

| Planet    | Filter   | Wavelength (nm) | $R_p/R_*$           | Source               |
|-----------|----------|-----------------|---------------------|----------------------|
| CoRoT-12b | Harris R | 658             | $0.1645 \pm 0.0040$ | This paper           |
| CoRoT-12b | Clear    | 400–900         | $0.1321 \pm 0.0011$ | Gillon et al. (2010) |

*Notes.* This table is available in its entirety in machine-readable form in the online journal. A portion is shown here for guidance regarding its form and content.

parameters agree with previous literature to within  $1\sigma$  and our calculated period closely agrees with the period found by Southworth et al. (2015) (Tables 5 and 7). A variation in  $R_p/R_*$  is found from the ultraviolet to the near-infrared wavelengths (Table 9; Fig. 7) consistent with that found by Southworth & Evans (2016).

We correct for the dilution due to the companion star being in our aperture using the procedure described below (this procedure is similar to that done by Southworth & Evans 2016). (1) The light curve is modelled with EXOMOP and we find an uncorrected transit depth of  $(R_p/R_*)_{\text{uncor}} = 0.1174 \pm 0.0016$ . (2) Theoretical spectra of both stars are produced using ATLAS9-ODFNEW (Castelli & Kurucz 2004). For WASP-103, we use  $T_{\text{eff}} = 6110$  K and  $M_{\text{star}} = 1.22 M_{\odot}$  (Gillon et al. 2014) and for the companion star, we use  $T_{\text{eff}} = 4405$  K (Southworth & Evans 2016) and  $M_{\text{star}} = 0.721 M_{\odot}$  (Ngo et al. 2016). Additionally, in order to scale the spectrum correctly, we use the mass–luminosity relation  $L = L_{\odot}(M/M_{\odot})^4$  for stars between  $0.5M_{\odot}$  and  $2M_{\odot}$ . (3) The ATLAS9-ODFNEW model spectra is convolved with the bandpass of the Bessell U filter (Bessell 1979). (4) The corrected transit depth,  $(R_p/R_*)_{\text{cor}}$ , is found using the equation (Ciardi et al. 2015)

$$\left(\frac{R_p}{R_*}\right)_{\text{cor}} = \left(\frac{R_p}{R_*}\right)_{\text{uncor}} \sqrt{\frac{F_{\text{tot}}}{F_2}}, \quad (4)$$

where  $F_{\text{tot}}$  is the total flux of both stars and  $F_2$  is the flux from the companion star. In Southworth & Evans (2016), the error of the photometric light curve dominated the error calculation of their corrected transit depth and therefore we also use our photometric error bars for the error in the  $(R_p/R_*)_{\text{cor}}$ . Using this procedure we find an  $(R_p/R_*)_{\text{cor}} = 0.1181 \pm 0.0016$ .

### 5.11 XO-3b

XO-3b is a massive planet ( $11.79 \pm 0.59 M_{\text{Jup}}$ ) with a large eccentricity ( $0.26 \pm 0.017$ ) detected by the XO survey (Johns-Krull et al. 2008). Further photometric observations have refined the system’s parameters (Winn et al. 2008; Machalek et al. 2010; Hirano et al. 2011; Wong et al. 2014) and Hébrard et al. (2008) found that XO-3’s spin axis is misaligned with XO-3b’s rotation axis.

We observed a transit of XO-3b on 2012 November 30 with the Harris B filter (Fig. 3). We derive physical parameters that are in agreement with previous literature (Tables 5 and 7). Our calculated  $R_p/R_*$  is  $2\sigma$  larger than the V-band  $R_p/R_*$  found by Winn et al. (2008). We calculate a refined period with an error decreased by a

factor of 13 from the value found by Winn et al. (2008). A non-flat spectrum for  $R_p/R_*$  is found for XO-3b (Table 9; Fig. 7).

## 6 DISCUSSION

### 6.1 Wavelength dependence on the transit depth

We find a constant transit depth across optical wavelengths for the TEPs HAT-P-5b, HAT-P-12b, WASP-2b, WASP-24b and WASP-80b (Fig. 6, Table 9). A lack of variation in radius with wavelength could suggest these planets (HAT-P-5b, HAT-P-12b, WASP-2b, WASP-80b) have clouds/hazes in their upper atmospheres (e.g. Seager & Sasselov 2000; Brown 2001; Gibson et al. 2013b; Marley et al. 2013; Kreidberg et al. 2014) or they have an isothermal pressure–temperature profile (Fortney et al. 2006). Mancini et al. (2014) also do not detect a significant variation in WASP-80b’s transit depth with wavelength, and Southworth et al. (2012) finds a relatively flat spectrum of planetary radii for HAT-P-5b with the exception of their observed radius in the U band (which they suspect is caused by systematic error in their U-band photometry). A flat spectrum for WASP-24b is also found with the exception of one value. Our R-band  $R_p/R_*$  found for WASP-24b differs by  $4\sigma$  from the previously calculated  $R_p/R_*$  (Southworth et al. 2014) for that same band. The cause of this is unclear and future observations are needed to investigate. Our results are consistent with other transiting exoplanet observations having a flat spectrum in optical wavelengths (i.e. TrES-3b, Turner et al. 2013; GJ 1214b, Bean et al. 2011; Kreidberg et al. 2014; WASP-29b, Gibson et al. 2013a; Gibson et al. 2013b; HAT-P-19b, Mallonn et al. 2015a; HAT-P-1b, HAT-P-13b, HAT-P-16b, HAT-P-22b, TrES-2b, WASP-33b, WASP-44b, WASP-48b, WASP-77Ab, Turner et al. 2016b).

We find variations in the transit depth with wavelength for CoRoT-12b, HAT-P-33b, HAT-P-37b, WASP-103b and XO-3b (Figs 6 and 7, Table 9), which could indicate scattering (i.e. due to aerosols or Rayleigh scattering) or absorption in their atmospheres (e.g. Benneke & Seager 2012; Griffith 2014). Our observation of HAT-P-37b exhibits a smaller transit depth in B band than the red/near-IR value. Such a variation has only been seen in a recent paper by Evans et al. (2016) where they observe a smaller B-band transit depth than optical in WASP-121b. Evans et al. (2016) believe a possible cause of such a variation is TiO/VO absorption and this may also be the cause of the transit depth variations seen in HAT-P-37b. However, more theoretic modelling is needed to confirm

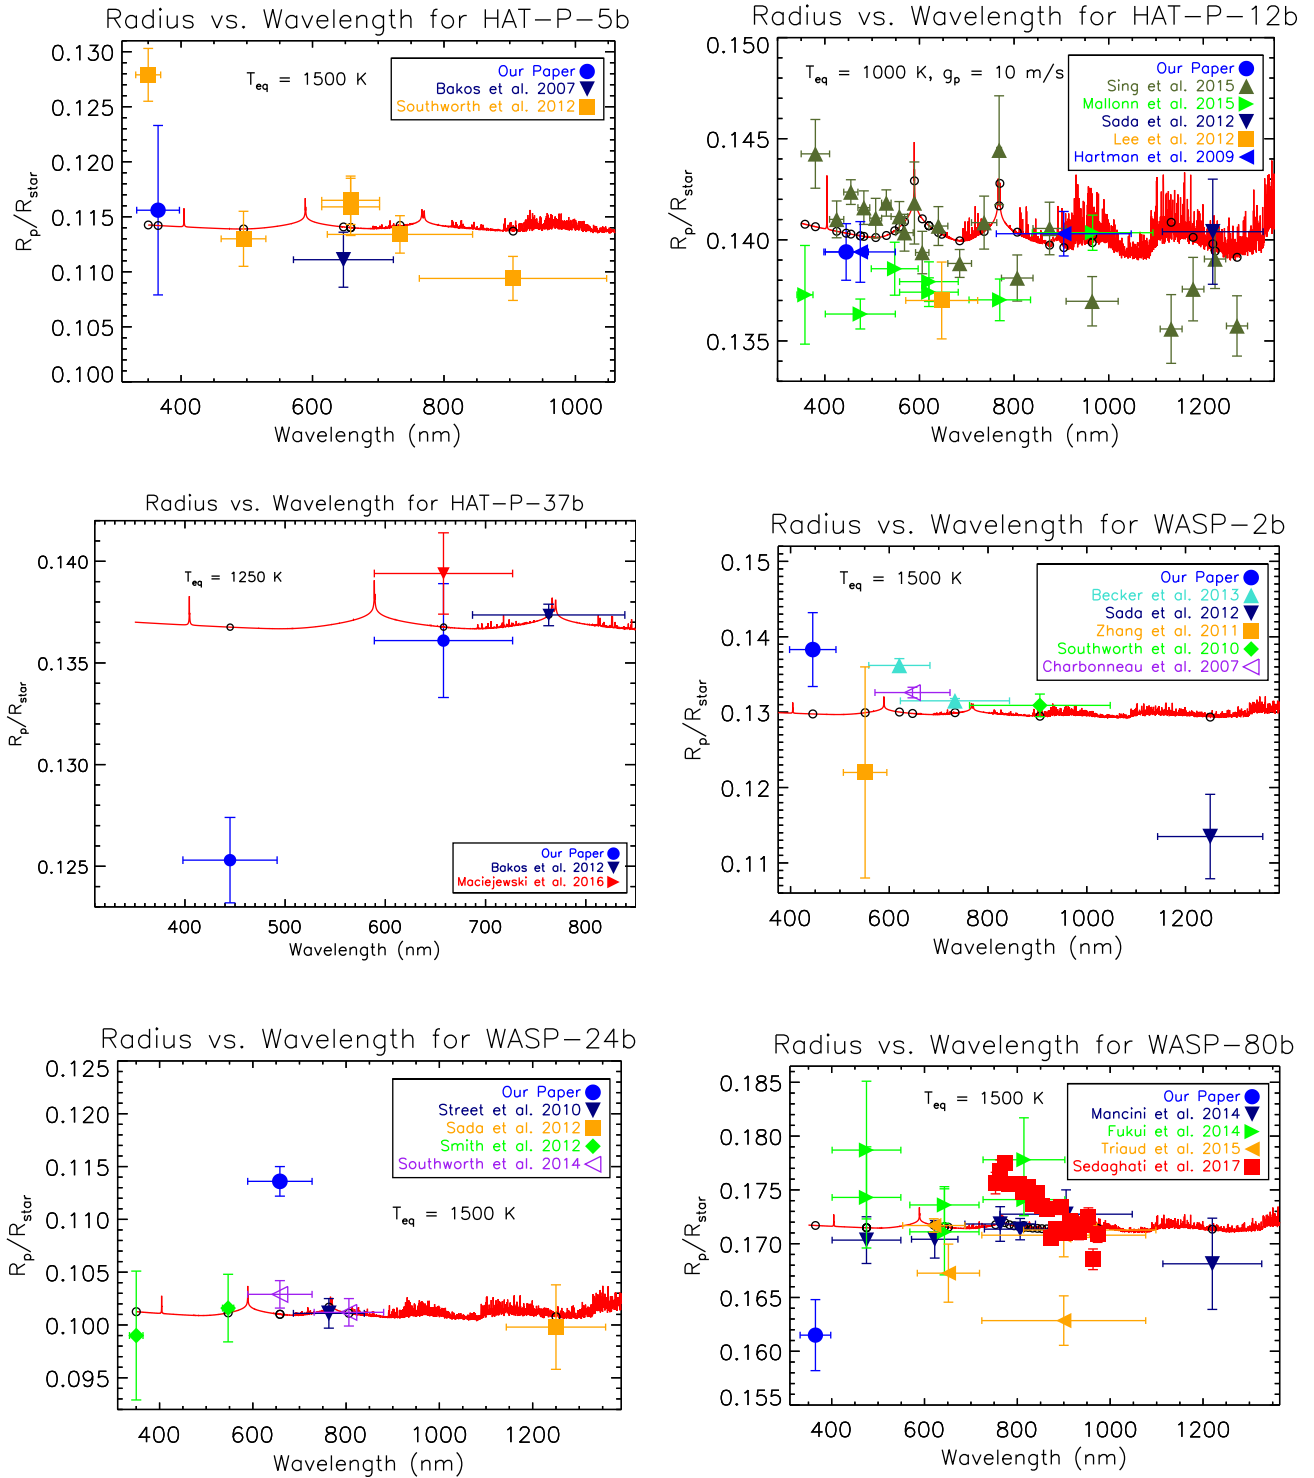

**Figure 6.** Plot of  $R_p/R_*$  against wavelength for HAT-P-5b, HAT-P-12b, HAT-P-37b, WASP-2b, WASP-24b and WASP-80b from this paper and previous literature. Our data are shown as blue circles. Overplotted in red are atmospheric models by Fortney & Nettelmann (2010) for planets with a  $1 M_{\text{Jup}}$ ,  $g_p = 25 \text{ ms}^{-1}$  (unless specified on plot),  $T_{\text{eq}}$  (specified on plot) and a base radius of  $1.25 R_{\text{Jup}}$  at 10 bar. We find that HAT-P-5b, HAT-P-12b, WASP-2b and WASP-80b have flat spectra that could indicate the presence of clouds. The transit depth variation of HAT-P-37b could be due to absorption of TiO/VO (Evans et al. 2016).

that TiO/VO is in fact the opacity source. Additionally, a smaller near-UV radius was recently observed in the hot Jupiter WASP-1b (Turner et al. 2016b); however, these observations did not observe in the *B* band. Future near-UV and blue-band observations are needed for WASP-103b and XO-3b to determine whether the scattering

in their atmospheres is due to Rayleigh scattering (Lecavelier Des Etangs et al. 2008; Tinetti et al. 2010; de Wit & Seager 2013; Griffith 2014) since these bands are the only optical wavelengths that are not affected by strong spectral features. The radius variations in WASP-103b show a consistently larger transit depth in the

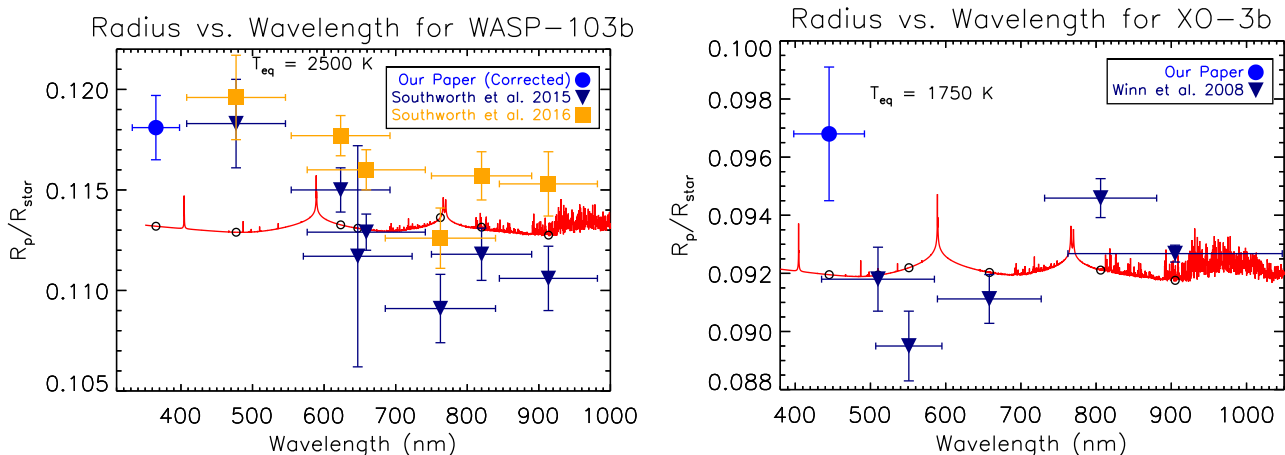

**Figure 7.** Plot of  $R_p/R_*$  against wavelength for WASP-103b and XO-3b from this paper and previous literature. Both WASP-103b and XO-3b show variations with wavelength. Other comments are the same as Fig. 6.

near-UV and blue than the rest of the optical (this variation is still present when corrected for dilution due the companion star). Such a radius variation may indicate a change in particle size at different altitudes of the planetary atmosphere (e.g. Wakeford & Sing 2015). We find a larger  $R$ -band transit depth in HAT-P-33b and CoRoT-12b than their discovery transit depths. Since the  $R$ -filter encompasses the  $H\alpha$  line (656.281 nm), our observation could be an indication of atmospheric escape such as that observed in the atmospheres of HD 189733b (Jensen et al. 2012; Cauley et al. 2015; Barnes et al. 2016; Cauley, Redfield & Jensen 2017a; Cauley, Redfield & Jensen 2017b) and HD 209458b (Astudillo-Defru & Rojo 2013) and predicted (e.g. Christie, Arras & Li 2013; Turner et al. 2016a). Follow-up photometry and high-resolution spectroscopy observations are encouraged to confirm all the transit depth variations. These results also agree with observations of other exoplanets not having a flat spectrum (i.e. HD 209458b, Sing et al. 2008; HAT-P-5b, Southworth et al. 2012; GJ 3470b, Nascimbeni et al. 2013; Qatar-2, Mancini et al. 2014; WASP-17b, WASP-39b, HAT-P-1b, WASP-31b, HAT-P-12b, HD189733b, WASP-6b, Sing et al. 2016; CoRoT-1b, TrES-4b, WASP-1b, WASP-12b, WASP-36b, Turner et al. 2016b).

For illustration, the observed  $R_p/R_*$  differences with wavelength for each target (Table 9) are compared to theoretical predictions (Fortney & Nettelmann 2010) for a model planetary atmosphere (Figs 6 and 7). The models used are calculated for planets with a  $1 M_{\text{Jup}}$ ,  $g_p = 25\text{ms}^{-1}$  or  $g_p = 10\text{ms}^{-1}$ , base radius of  $1.25 R_{\text{Jup}}$  at 10 bar,  $T_{\text{eq}}$  closest to the measured value for each exoplanet (with model choices of 500, 750, 1000, 1250, 1500, 1750, 2000, 2500 K), and solar metallicity. To provide a best fit to the spectral changes, a vertical offset is applied to the model. This comparison is helpful as it illustrates the size of observed variation compared to what the theoretical models predict. However, radiative transfer models calculated for each exoplanet individually are needed to fully understand their transmission spectra.

Finally, no signs of asymmetric transits are seen in the near-UV light curves of HAT-P-5b, WASP-80b and WASP-103b. This result is consistent with ground-based near-UV observations of 19 other transiting exoplanets (Southworth et al. 2012; Copperwheat et al. 2013; Turner et al. 2013; Bento et al. 2014; Pearson et al. 2014; Zellem et al. 2015; Turner et al. 2016b) which show no evidence of asymmetric transits. Additionally, theoretical modelling by Turner et al. (2016a) using the CLOUDY plasma simulation code showed that

asymmetric transits cannot be produced in the broad-band near-UV band regardless of the assumed physical phenomena that could cause absorption (e.g. Lai, Helling & van den Heuvel 2010; Vidotto, Jardine & Helling 2010; Ben-Jaffel & Ballester 2014; Matsakos, Uribe & Königl 2015; Kislyakova et al. 2016).

### 6.1.1 Variability in the host stars

One of the major assumptions in our interpretation that the planetary atmosphere is the cause of the transit depth variations is that the brightness of the host stars have minimal variability due to stellar activity. The presence of star spots and stellar activity can produce variations in the observed transit depth (e.g. Czesla et al. 2009; Oshagh et al. 2013, 2014; Zellem et al. 2015, 2017). This effect is stronger in the near-UV and blue and can mimic a Rayleigh scattering signature (e.g. Oshagh et al. 2014; McCullough et al. 2014). Additionally, no obvious star spot crossing is seen in our data (Figs 1–3) with the possible exception of HAT-P-37b (see below).

We estimate how much the transit depth may change due to unocculted spots using the formalization presented by Sing et al. (2011). This method assumes that the spots can be treated as a stellar spectrum but with a lower effective temperature, no surface brightness variation outside the spots and no plage are present. The effect of these assumptions are a dimming of the star and therefore an increase in the transit depth. Sing et al. (2011) find for HD 189733b that the change in transit depth due to unocculted spots,  $\Delta(R_p/R_*) = 2.08 \times 10^{-3}/2(R_p/R_*)$  between 375 and 400 nm. Therefore, unocculted spots have minimal influence (assuming our host stars have unocculted spots similar to HD 189733b) on the observed transit depth variations since our final error bars (Table 5) are at least 10 times larger than the influence of these spots (e.g.  $\Delta[R_p/R_*] = 0.00014$  for HAT-P-37b). Qualitatively, this result is consistent with the study by Llama & Shkolnik (2015) that find that stellar activity similar to the sun has very little effect on the transit depth measured in near-UV to optical wavelengths. None the less, we highly encourage follow-up observations and host star monitoring of all our targets to assess the effect of stellar activity on the observed transit depth variations.

Next, we investigate what effect a star-spot crossing in the light curve of HAT-P-37 would have on its calculated transit depth. In the  $B$ -band light curve of HAT-P-37b (Fig. 1), there may be a star-spot

crossing at a phase range of 0.004–0.008. However, the detected signal is very close to the scatter in the light curve. If we model the light curve without the possible star-spot crossing, we find an  $(R_p/R_*) = 0.1278 \pm 0.0048$ , within  $1\sigma$  of the transit depth of the entire light curve ( $0.1253 \pm 0.0021$ ). McCullough et al. (2014) present a procedure to estimate the effects of unocculted spots on the transit depth. Their procedure can also be used to estimate the effect of star spot crossings on the transit depth, where instead of unocculted spots increasing the transit depth occulted spots should decrease it. McCullough et al. (2014) find that the change in transit depth due to spots,  $\Delta(R_p^2/R_*^2)$ , is

$$\Delta \left( \frac{R_p^2}{R_*^2} \right) = \left( \frac{R_p}{R_*} \right)^2 \delta \frac{T_{\text{spot}}}{T_{\text{eff}}}, \quad (5)$$

where  $R_p/R_*$  is the unperturbed transit depth,  $\delta$  is the fractional area of star spots and  $T_{\text{spot}}$  is the temperature of the spot. If we set  $\Delta(R_p^2/R_*^2) = 3100$  ppm (the approximate difference between our *B*-band and the Sloan-*i* transit depth; Hartman et al. 2011), then we can estimate  $T_{\text{spot}}$  and  $\delta$ . For spot temperatures between 2000 and 5000 K, we find that  $\delta$  would be between 20 and 50 per cent. Typical values of  $\delta$  for solar-like stars is around several per cent (e.g. Pont et al. 2008; Sing et al. 2011; McCullough et al. 2014), so our estimated  $\delta$  range is extremely high. Due to both these tests, it seems unlikely that the smaller *B*-band transit depth of HAT-P-37b is due to an occulted star-spot.

## 7 CONCLUSIONS

We observed 11 transiting hot Jupiters (CoRoT-12b, HAT-P-5b, HAT-P-12b, HAT-P-33b, HAT-P-37b, WASP-2b, WASP-24b, WASP-60b, WASP-80b, WASP-103b, XO-3b) from the ground using near-UV and optical filters in order to update their system parameters and constrain their atmospheres. Our observations of CoRoT-12b, HAT-P-37b and WASP-60b are the first follow-up observations of these planets since their discovery and we also obtain the first near-UV light curves of WASP-80b and WASP-103b. We find that HAT-P-5b, HAT-P-12b, WASP-2b, WASP-24b and WASP-80b exhibit a flat spectrum across the optical wavelengths, suggestive of clouds in their atmospheres. Variation in the transit depths is observed for WASP-103b and XO-3b and may indicate scattering in their atmospheres. Additionally, we observe a smaller *B*-band transit depth compared to near-IR in HAT-P-37b. Such a variation may be caused by TiO/VO absorption (Evans et al. 2016). We find a larger *R*-band (which encompasses the H  $\alpha$  line) transit depths in HAT-P-33b and CoRoT-12b and this result may indicate possible atmospheric escape. Follow-up photometry and high-resolution spectroscopy observations are encouraged to confirm all the observed transit depth variations since they are only seen at  $2\sigma$ – $4.6\sigma$ . Our calculated physical parameters agree with previous studies within  $1\sigma$  with a few exceptions (Tables 6 and 7). For the exoplanets HAT-P-12b, HAT-P-37b, WASP-2b, WASP-24b, WASP-80b and XO-3b, we are able to refine their orbital periods from previous work (Tables 6 and 7).

## ACKNOWLEDGEMENTS

JT, RL and RJ were partially supported by the NASA’s Planetary Atmospheres programme. JT and RL were also supported by The Double Hoo Research Grant. JT was also partially funded by the National Science Foundation Graduate Research Fellowship under grant no. DGE-1315231.

We would like thank Robert T. Zellem for his help with observations. This research has made use of the Exoplanet Orbit Database (Wright et al. 2011), Exoplanet Data Explorer at exoplanets.org, Exoplanet Transit Database, Extrasolar Planet Transit Finder, NASA’s Astrophysics Data System Bibliographic Services and the International Variable Star Index (VSX) data base, operated at AAVSO, Cambridge, Massachusetts, USA. This research has also made use of the NASA Exoplanet Archive, which is operated by the California Institute of Technology, under contract with the National Aeronautics and Space Administration under the Exoplanet Exploration Program. We also thank the anonymous referee, whose comments helped improve this paper.

## REFERENCES

- Akeson R. L. et al., 2013, *PASP*, 125, 989  
 Albrecht S. et al., 2011, *ApJ*, 738, 50  
 Astudillo-Defru N., Rojo P., 2013, *A&A*, 557, A56  
 Baglin A., 2003, *Adv. Space Res.*, 31, 345  
 Bakos G. Á. et al., 2007, *ApJ*, 671, L173  
 Bakos G. Á. et al., 2012, *AJ*, 144, 19  
 Barnes J. W., van Eyken J. C., Jackson B. K., Ciardi D. R., Fortney J. J., 2013, *ApJ*, 774, 53  
 Barnes J. R., Haswell C. A., Staab D., Anglada-Escudé G., 2016, *MNRAS*, 462, 1012  
 Bean J. L. et al., 2011, *ApJ*, 743, 92  
 Becker A. C., Kundurthy P., Agol E., Barnes R., Williams B. F., Rose A. E., 2013, *ApJ*, 764, L17  
 Ben-Jaffel L., Ballester G. E., 2014, *ApJ*, 785, L30  
 Benneke B., Seager S., 2012, *ApJ*, 753, 100  
 Bento J. et al., 2014, *MNRAS*, 437, 1511  
 Bessell M. S., 1979, *PASP*, 91, 589  
 Biddle L. I. et al., 2014, *MNRAS*, 443, 1810  
 Borucki W. J. et al., 2010, *Science*, 327, 977  
 Braak C., 2006, *Stat. Comput.*, 16, 239  
 Brown T. M., 2001, *ApJ*, 553, 1006  
 Bruntt H., Southworth J., Torres G., Penny A. J., Clausen J. V., Buzasi D. L., 2006, *A&A*, 456, 651  
 Carone L. et al., 2012, *A&A*, 538, A112  
 Carter J. A., Winn J. N., 2009, *ApJ*, 704, 51  
 Castelli F., Kurucz R. L., 2004, preprint ([astro-ph/0405087](https://arxiv.org/abs/astro-ph/0405087))  
 Cauley P. W., Redfield S., Jensen A. G., Barman T., Endl M., Cochran W. D., 2015, *ApJ*, 810, 13  
 Cauley P. W., Redfield S., Jensen A. G., 2017a, *AJ*, 153, 185  
 Cauley P. W., Redfield S., Jensen A. G., 2017b, *AJ*, 153, 217  
 Charbonneau D., Brown T. M., Latham D. W., Mayor M., 2000, *ApJ*, 529, L45  
 Charbonneau D., Brown T. M., Noyes R. W., Gilliland R. L., 2002, *ApJ*, 568, 377  
 Charbonneau D., Brown T. M., Burrows A., Laughlin G., 2007, *Protostars and Planets V*. Univ. Arizona Press, Tucson, AZ, p. 701  
 Christie D., Arras P., Li Z.-Y., 2013, *ApJ*, 772, 144  
 Ciardi D. R., Beichman C. A., Horch E. P., Howell S. B., 2015, *ApJ*, 805, 16  
 Claret A., Bloemen S., 2011, *A&A*, 529, A75  
 Collier Cameron A. et al., 2007, *MNRAS*, 375, 951  
 Copperwheat C. M. et al., 2013, *MNRAS*, 434, 661  
 Czesla S., Huber K. F., Wolter U., Schröter S., Schmitt J. H. M. M., 2009, *A&A*, 505, 1277  
 Daemgen S., Hormuth F., Brandner W., Bergfors C., Janson M., Hippler S., Henning T., 2009, *A&A*, 498, 567  
 de Wit J., Seager S., 2013, *Science*, 342, 1473  
 Dittmann J. A., Close L. M., Green E. M., Scuderi L. J., Males J. R., 2009a, *ApJ*, 699, L48  
 Dittmann J. A., Close L. M., Green E. M., Fenwick M., 2009b, *ApJ*, 701, 756

- Dittmann J. A., Close L. M., Scuderi L. J., Morris M. D., 2010, *ApJ*, 717, 235
- Dittmann J. A., Close L. M., Scuderi L. J., Turner J., Stephenson P. C., 2012, *New Astron.*, 17, 438
- Eastman J., Siverd R., Gaudi B. S., 2010, *PASP*, 122, 935
- Eastman J., Gaudi B. S., Agol E., 2013, *PASP*, 125, 83
- Evans T. M. et al., 2016, *ApJ*, 822, L4
- Ford E. B., 2006, *ApJ*, 642, 505
- Fortney J. J., Nettelmann N., 2010, *Space Sci. Rev.*, 152, 423
- Fortney J. J., Cooper C. S., Showman A. P., Marley M. S., Freedman R. S., 2006, *ApJ*, 652, 746
- Fortney J. J., Marley M. S., Barnes J. W., 2007, *ApJ*, 659, 1661
- Fukui A. et al., 2014, *ApJ*, 790, 108
- Gelman A., Rubin D. B., 1992, *Stat. Sci.*, 7, 457
- Gibson N. P., Aigrain S., Barstow J. K., Evans T. M., Fletcher L. N., Irwin P. G. J., 2013a, *MNRAS*, 428, 3680
- Gibson N. P., Aigrain S., Barstow J. K., Evans T. M., Fletcher L. N., Irwin P. G. J., 2013b, *MNRAS*, 436, 2974
- Gillon M. et al., 2010, *A&A*, 520, A97
- Gillon M. et al., 2014, *A&A*, 562, L3
- Griffith C. A., 2014, *Phil. Trans. R. Soc. A*, 372, 30086
- Hartman J. D. et al., 2009, *ApJ*, 706, 785
- Hartman J. D. et al., 2011, *ApJ*, 742, 59
- Hébrard G. et al., 2008, *A&A*, 488, 763
- Hébrard G. et al., 2013, *A&A*, 549, A134
- Henry G. W., Marcy G. W., Butler R. P., Vogt S. S., 2000, *ApJ*, 529, L41
- Hirano T., Narita N., Sato B., Winn J. N., Aoki W., Tamura M., Taruya A., Suto Y., 2011, *PASJ*, 63, L57
- Holman M. J., Murray N. W., 2005, *Science*, 307, 1288
- Holman M. J. et al., 2010, *Science*, 330, 51
- Howell S. B. et al., 2014, *PASP*, 126, 398
- Hubbard W. B., Fortney J. J., Lunine J. I., Burrows A., Sudarsky D., Pinto P., 2001, *ApJ*, 560, 413
- Husnoo N., Pont F., Mazeh T., Fabrycky D., Hébrard G., Bouchy F., Shporer A., 2012, *MNRAS*, 422, 3151
- Jensen A. G., Redfield S., Endl M., Cochran W. D., Koesterke L., Barman T., 2012, *ApJ*, 751, 86
- Johns-Krull C. M. et al., 2008, *ApJ*, 677, 657
- Kislyakova K. G. et al., 2016, *MNRAS*, 461, 988
- Kreidberg L. et al., 2014, *Nature*, 505, 69
- Lai D., Helling C., van den Heuvel E. P. J., 2010, *ApJ*, 721, 923
- Lecavelier Des Etangs A., Pont F., Vidal-Madjar A., Sing D., 2008, *A&A*, 481, L83
- Lee J. W., Youn J.-H., Kim S.-L., Lee C.-U., Hinse T. C., 2012, *AJ*, 143, 95
- Lendl M., Cubillos P. E., Hagelberg J., Müller A., Juvan I., Fossati L., 2017, preprint ([arXiv:1708.05737](https://arxiv.org/abs/1708.05737))
- Line M. R., Knutson H., Deming D., Wilkins A., Desert J.-M., 2013, *ApJ*, 778, 183
- Llama J., Shkolnik E. L., 2015, *ApJ*, 802, 41
- McCullough P. R., Crouzet N., Deming D., Madhusudhan N., 2014, *ApJ*, 791, 55
- Machalek P., Greene T., McCullough P. R., Burrows A., Burke C. J., Hora J. L., Johns-Krull C. M., Deming D. L., 2010, *ApJ*, 711, 111
- Maciejewski G. et al., 2016, *Acta Astron.*, 66, 55
- Mallon M. et al., 2015a, *A&A*, 580, A60
- Mallon M. et al., 2015b, *A&A*, 583, A138
- Mancini L. et al., 2014, *A&A*, 562, A126
- Mandel K., Agol E., 2002, *ApJ*, 580, L171
- Markwardt C. B., 2009, in Bohlender D. A., Durand D., Dowler P., eds, *ASP Conf. Ser. Vol. 411, Astronomical Data Analysis Software and Systems XVIII*. Astron. Soc. Pac., San Francisco, p. 251
- Marley M. S., Ackerman A. S., Cuzzi J. N., Kitzmann D., 2013, *Clouds and Hazes in Exoplanet Atmospheres*. Univ. Arizona Press, Tucson, AZ, p. 367
- Matsakos T., Uribe A., Königl A., 2015, *A&A*, 578, A6
- Miranda-Escudé J., 2002, *ApJ*, 564, 1019
- Moutou C. et al., 2013, *Icarus*, 226, 1625
- Nascimbeni V., Piotto G., Pagano I., Scandariato G., Sani E., Fumana M., 2013, *A&A*, 559, A32
- Ngo H. et al., 2016, *ApJ*, 827, 8
- Oshagh M., Santos N. C., Boisse I., Boué G., Montalto M., Dumusque X., Haghhighipour N., 2013, *A&A*, 556, A19
- Oshagh M., Santos N. C., Ehrenreich D., Haghhighipour N., Figueira P., Santerne A., Montalto M., 2014, *A&A*, 568, A99
- Parviainen H. et al., 2017, preprint ([arXiv:1709.01875](https://arxiv.org/abs/1709.01875))
- Pearson K. A., Turner J. D., Sagan T. G., 2014, *New Astron.*, 27, 102
- Pollacco D. L. et al., 2006, *PASP*, 118, 1407
- Pont F., Zucker S., Queloz D., 2006, *MNRAS*, 373, 231
- Pont F., Knutson H., Gilliland R. L., Moutou C., Charbonneau D., 2008, *MNRAS*, 385, 109
- Press W. H., Teukolsky S. A., Vetterling W. T., Flannery B. P., 1992, *Numerical Recipes in FORTRAN. The Art of Scientific Computing*. Cambridge Univ. Press, Cambridge
- Saar S. H., Butler R. P., Marcy G. W., 1998, *ApJ*, 498, L153
- Sada P. V., Ramón-Fox F. G., 2016, *PASP*, 128, 024402
- Sada P. V. et al., 2012, *PASP*, 124, 212
- Safronov V. S., 1972, *Evolution of the Protoplanetary Cloud and Formation of the Earth and Planets*. Keter Publ. House, Jerusalem, p. 212
- Salz M., Schneider P. C., Czesla S., Schmitt J. H. M. M., 2015, *A&A*, 576, A42
- Schwarz G., 1978, *Ann. Stat.*, 6, 461
- Scuderi L. J., Dittmann J. A., Males J. R., Green E. M., Close L. M., 2010, *ApJ*, 714, 462
- Seager S., 2011, *Exoplanets*. Univ. Arizona Press, Tucson, AZ
- Seager S., Sasselov D. D., 2000, *ApJ*, 537, 916
- Sedaghati E., Boffin H. M. J., Delrez L., Gillon M., Csizmadia S., Smith A. M. S., Rauer H., 2017, *MNRAS*, 468, 3123
- Simpson E. K. et al., 2011, *MNRAS*, 414, 3023
- Sing D. K., Vidal-Madjar A., Désert J.-M., Lecavelier des Etangs A., Ballester G., 2008, *ApJ*, 686, 658
- Sing D. K. et al., 2011, *MNRAS*, 416, 1443
- Sing D. K. et al., 2016, *Nature*, 529, 59
- Sokov E. N. et al., 2012, *Astron. Lett.*, 38, 180
- Southworth J., 2008, *MNRAS*, 386, 1644
- Southworth J., 2010, *MNRAS*, 408, 1689
- Southworth J., Evans D. F., 2016, *MNRAS*, 463, 37
- Southworth J., Wheatley P. J., Sams G., 2007a, *MNRAS*, 379, L11
- Southworth J., Bruntt H., Buzasi D. L., 2007b, *A&A*, 467, 1215
- Southworth J. et al., 2010, *MNRAS*, 408, 1680
- Southworth J., Mancini L., Maxted P. F. L., Bruni I., Tregloan-Reed J., Barbieri M., Ruocco N., Wheatley P. J., 2012, *MNRAS*, 422, 3099
- Southworth J. et al., 2014, *MNRAS*, 444, 776
- Southworth J. et al., 2015, *MNRAS*, 447, 711
- Street R. A. et al., 2010, *ApJ*, 720, 337
- Teske J. K., Turner J. D., Mueller M., Griffith C. A., 2013, *MNRAS*, 431, 1669
- Tinetti G., Deroo P., Swain M. R., Griffith C. A., Vasisht G., Brown L. R., Burke C., McCullough P., 2010, *ApJ*, 712, L139
- Torres G., Winn J. N., Holman M. J., 2008, *ApJ*, 677, 1324
- Triaud A. H. M. J. et al., 2010, *A&A*, 524, A25
- Triaud A. H. M. J. et al., 2013, *A&A*, 551, A80
- Triaud A. H. M. J. et al., 2015, *MNRAS*, 450, 2279
- Turner J. D. et al., 2013, *MNRAS*, 428, 678
- Turner J. D., Christie D., Arras P., Johnson R. E., Schmidt C., 2016a, *MNRAS*, 458, 3880
- Turner J. D. et al., 2016b, *MNRAS*, 459, 789
- Vidotto A. A., Jardine M., Helling C., 2010, *ApJ*, 722, L168
- Wakeford H. R., Sing D. K., 2015, *A&A*, 573, A122
- Wang Y.-H. et al., 2017, *AJ*, 154, 49
- Winn J. N., 2011, in Seager S., ed., *Exoplanet Transits and Occultations*. Univ. Arizona Press, Tucson, AZ
- Winn J. N. et al., 2008, *ApJ*, 683, 1076
- Wöllert M., Brandner W., 2015, *A&A*, 579, A129
- Wong I. et al., 2014, *ApJ*, 794, 134

Wright J. T. et al., 2011, PASP, 123, 412  
Zellem R. T. et al., 2015, ApJ, 810, 11  
Zellem R. T. et al., 2017, ApJ, 844, 27  
Zhang J.-C., Cao C., Song N., Wang F.-G., Zhang X.-T., 2011, Chin. Astron. Astrophys., 35, 409

### SUPPORTING INFORMATION

Supplementary data are available at [MNRAS](#) online.

**Table 2.** Photometry of all our light curves.

**Table 8.** Results of the transit timing analysis.

**Table 9.**  $R_p/R_s$  and effective central wavelength  $\lambda_{\text{eff}}$  from this paper and previous literature for all targets.

Please note: Oxford University Press is not responsible for the content or functionality of any supporting materials supplied by the authors. Any queries (other than missing material) should be directed to the corresponding author for the article.

This paper has been typeset from a  $\text{T}_{\text{E}}\text{X}/\text{L}^{\text{A}}\text{T}_{\text{E}}\text{X}$  file prepared by the author.
